# Supplementary material for: Genomic Prediction of Biological Shape: Elliptic Fourier Analysis and Kernel Partial Least Squares (PLS) Regression Applied to Grain Shape Prediction in Rice (Oryza sativa L.)
Source: PubMed Central journal article supplement (PMC4380318; doi:10.1371/journal.pone.0120610), 2015-03-31
Supplement: pone.0120610.s005.pdf [file pone.0120610.s005.pdf]

Table S1. Accessions in rice germplasm at the National Institute of Agrobiological Sciences (NIAS) Genebank, which were involved in dataset A

| JP.ID* | Name                   | JP.ID | Name                              |
|--------|------------------------|-------|-----------------------------------|
|        | 71249 91-382           |       | 84983 CS-S4                       |
|        | 11930 Aijjaonante      |       | 83160 Dabaigu                     |
|        | 43474 Aijjaonuo        |       | 79697 Dahonggu                    |
| NA**   | Akage                  |       | 11619 Daidantou                   |
| NA     | Akihikari              |       | 83139 Dalibaigu                   |
|        | 70701 Amane            |       | 84313 Dangrey                     |
|        | 104588 Angpor Sang San |       | 12426 Davao 1                     |
|        | 54300 Anjana Dhan      |       | 147493 Deegeowoogen               |
|        | 54581 ARC 11094        | NA    | Deejaohualuo                      |
|        | 54610 ARC 5955         |       | 11828 Deng Pao Zhai (Toufutsusai) |
|        | 54631 ARC 6565         |       | 54518 Dhalashaita                 |
|        | 54573 ARC 7047         |       | 42944 Dianyu 1                    |
|        | 54575 ARC 7260         |       | 37948 Dinalaga                    |
|        | 54633 ARC 7286         |       | 81944 Dumja Kaap                  |
|        | 54576 ARC 7291         | NA    | Fujisaka 5                        |
|        | 54634 ARC 7323         |       | 54586 Gambir                      |
|        | 54635 ARC 7336         | NA    | Ginbozu                           |
| NA     | Asahi                  |       | 14113 Godawee                     |
|        | 71239 Asu              |       | 11987 Guangluai 4                 |
|        | 54551 Aus 230          |       | 71244 Hasu                        |
|        | 70622 Aus 32           |       | 54373 Heipigu                     |
|        | 70620 Aus 47           |       | 14103 Hetadawee                   |
|        | 70541 Badari Dhan      | NA    | Hong Cheuh Zai                    |
|        | 12422 Basilanon        |       | 71375 Honggu                      |
|        | 105329 Bayuenuo        |       | 37735 Hongxienuo                  |
|        | 80448 Bei Khe          |       | 14109 Illan Kalagan               |
| NA     | Bie Blau               |       | 71274 Ippa                        |
|        | 12425 Binatangan 2     |       | 12456 IR 29                       |
|        | 12484 Bicol            |       | 180265 IR 58                      |
|        | 12719 Bodat Mayang     |       | 70452 Jadu                        |
|        | 82004 Bunt Kardu       |       | 14836 Jaguary                     |
|        | 12486 Calotoc          |       | 71261 Jarjan                      |
|        | 12416 Calutos          |       | 14030 Jena 035                    |
|        | 86156 Cha Sen Lun      |       | 54272 Jhimma                      |
|        | 12932 Chinsurah Boro 2 | NA    | Jhona 2                           |
|        | 53955 Chinya           | NA    | Jikkoku                           |
|        | 11611 Chuumoushi       |       | 79691 Jinguoin                    |
|        | 12907 Co 13            |       | 11814 Junsouhaku                  |

| JP.ID | Name                         | JP.ID | Name                    |
|-------|------------------------------|-------|-------------------------|
| NA    | Kahei                        |       | 80450 Neang Chhouk      |
|       | 11872 Kakouhaku              | NA    | Nepal 1                 |
|       | 54283 Kalo Dhan              | NA    | Nepal 18                |
|       | 54630 Kaloshahaita           | NA    | Nepal 555               |
|       | 14070 Kaluheenati            |       | 85148 Nepal 8           |
| NA    | Kameji                       |       | 77338 Nepale Jaran      |
|       | 11866 Kamochi Kantonfukinsan |       | 86151 Ngo Luu           |
|       | 44977 Kampar                 | NA    | Nipponbare              |
|       | 205306 Kasalath              |       | 54372 Niuyanggu 1       |
|       | 11633 Keiboba                | NA    | Norin 1                 |
|       | 76885 Ketan Gading           | NA    | Norin 29                |
|       | 104129 Khao Hang             | NA    | Norin 8                 |
|       | 78799 Khao Kwe Lan           |       | 83126 Oazalahy          |
|       | 12568 Khao Nok               | NA    | Oba                     |
|       | 83195 Khao Vay Deng          | NA    | Ochikara                |
|       | 86166 Khau Mac Kho           |       | 70700 Pachai Perumal    |
|       | 86141 Khau Tan Chiem         |       | 181273 Padi Bulu        |
|       | 86139 Khau Van Lanh          |       | 12721 Padi Kenikir Puti |
|       | 100783 Khemjya               |       | 103839 Padi Kuning      |
| NA    | Kinandang Puti               |       | 74372 Padi Perak        |
| NA    | Kinuhikari                   |       | 101011 Peam Chiker      |
|       | 100802 Kochum                |       | 12418 Pinulupot 1       |
| NA    | Koshihikari                  |       | 74384 Puluik Arang      |
|       | 11597 Lalahpak               |       | 12912 Pusur             |
|       | 12571 Lep Xang               |       | 53938 Puteh/Rubon(H)    |
|       | 100350 Linjawan(H)           |       | 106328 Py Khao          |
| NA    | Liuzhoubaoyazao              |       | 12170 Qingyu (Seiyu)    |
|       | 13277 Local Basmati          |       | 13178 Rambhog           |
|       | 12853 Ma sho                 |       | 13672 Ratul             |
|       | 77185 Manan Elatla           | NA    | Reiho                   |
|       | 74610 Maninjau               | NA    | Reimei                  |
|       | 11559 Manri 2                |       | 109700 Rexmont          |
| NA    | Masumikir                    |       | 14044 Seenady           |
|       | 37823 Milyang 23             | NA    | Sekiyama                |
|       | 11777 Moch Ine Sukensan      |       | 11555 Shinha Sen        |
|       | 81699 Moe Ma Kha             | NA    | Shinriki                |
| NA    | Muha                         |       | 54535 Shoni             |
|       | 13351 Naba                   |       | 11605 Shoutan Zairai    |

| JP.ID | Name                  | JP.ID | Name |
|-------|-----------------------|-------|------|
|       | 11831 Shuusoushu      |       |      |
|       | 80366 Shwe Nang Gyi   |       |      |
|       | 12723 Siampang        |       |      |
|       | 103853 Sikasunbo      |       |      |
|       | 181302 Sirendah Putih |       |      |
|       | 12887 Surjamukhi      |       |      |
|       | 12485 Tadukan         |       |      |
|       | 12276 Taichung 65     |       |      |
|       | 11647 Taiwan Sou      |       |      |
|       | 71279 Thapa Chinni    |       |      |
|       | 81972 Tima            |       |      |
|       | 11222 Toboshi         |       |      |
|       | 11821 Totou           |       |      |
|       | 70609 Tupa 121-3      |       |      |
|       | 70616 Tupa729         |       |      |
|       | 71954 Turakin         |       |      |
|       | 11595 Ubaisen         |       |      |
|       | 4656 Urasan 1         |       |      |
|       | 54647 Vandaran        |       |      |
|       | 77231 Vary Futsi      |       |      |
|       | 83162 Wahuigu         |       |      |
|       | 4375 Wase Sekitori F  |       |      |
|       | 14286 Wzbeuskij 2     |       |      |
|       | 86100 Xiaobaigu       |       |      |
| NA    | Xiligu                |       |      |
| NA    | Xuanchangmi           |       |      |
|       | 11731 Yousentou 29    |       |      |

\*Identification number of rice germplasm at the NIAS Genebank

\*\*Non-available
