# Supplementary material for: Genomic Prediction of Biological Shape: Elliptic Fourier Analysis and Kernel Partial Least Squares (PLS) Regression Applied to Grain Shape Prediction in Rice (Oryza sativa L.)
Source: PubMed Central journal article supplement (PMC4380318; doi:10.1371/journal.pone.0120610), 2015-03-31
Supplement: pone.0120610.s006.pdf [file pone.0120610.s006.pdf]

Table S2. Accessions in Genetic Stocks - Oryza (GSOR) involved in datasets B and C

| GSOR*  | Name                   | Datasets** | GSOR   | Name                  | Datasets |
|--------|------------------------|------------|--------|-----------------------|----------|
| 301001 | Agostano               | B, C       | 301047 | Early Wataribune      | B, C     |
| 301002 | Aichi Asahi            | B          | 301048 | Eh Ia Chiu            | B, C     |
| 301003 | Ai-Chiao-Hong          | B, C       | 301049 | Firooz                | B, C     |
| 301004 | NSF-TV 4               | B, C       | 301050 | Fortuna               | B, C     |
| 301005 | NSF-TV 5               | B, C       | 301051 | Gerdeh                | B, C     |
| 301006 | ARC 7229               | B, C       | 301052 | Geumobyeo             | B, C     |
| 301007 | Arias                  | B, C       | 301053 | NSF-TV 57             | B, C     |
| 301008 | Asse Y Pung            | B, C       | 301054 | Ghati Kamma Nangarhar | B, C     |
| 301009 | Baber                  | B, C       | 301055 | Gogo Lempuk           | B, C     |
| 301010 | Baghlani Nangarhar     | B, C       | 301056 | Gotak Gatik           | B, C     |
| 301382 | Baguamon 15            | B, C       | 301057 | Guan-Yin-Tsan         | B, C     |
| 301011 | Basmati                | B, C       | 301386 | Gyehwa 3              | B, C     |
| 301012 | NSF-TV 13              | B, C       | 301387 | Haginomae Mochi       | B, C     |
| 301383 | Beonjo                 | B, C       | 301388 | Heukgyeong            | B, C     |
| 301014 | Bico Branco            | B, C       | 301058 | Honduras              | B, C     |
| 301015 | Binulawan              | B, C       | 301059 | Hsia Chioh Keh Tu     | B, C     |
| 301016 | BJ 1                   | B, C       | 301060 | Hu Lo Tao             | B, C     |
| 301017 | Black Gora             | B, C       | 301062 | IAC 25                | B, C     |
| 301018 | Blue Rose              | B, C       | 301063 | Iguape Cateto         | B, C     |
| 301020 | Caawa/Fortuna 6-103-15 | B, C       | 301064 | IR 36                 | B, C     |
| 301022 | Carolina Gold          | B, C       | 301065 | IR 8                  | B, C     |
| 301023 | Carolina Gold          | B, C       | 301066 | IRAT 177              | B, C     |
| 301024 | Carolina Gold Sel      | B, C       | 301067 | IRGA 409              | B, C     |
| 301025 | NSF-TV 27              | B, C       | 301068 | Jambu                 | B, C     |
| 301026 | Champa Tong 54         | B          | 301069 | Jaya                  | B, C     |
| 301027 | Chau                   | B, C       | 301070 | JC149                 | B, C     |
| 301030 | Chodongji              | B, C       | 301071 | Jhona 349             | B, C     |
| 301032 | NSF-TV 34              | B, C       | 301072 | Jouiku 393G           | B, C     |
| 301033 | CO18                   | B, C       | 301073 | K 65                  | B, C     |
| 301035 | Cuba 65                | B, C       | 301074 | Kalamkati             | B, C     |
| 301037 | NSF-TV 39              | B, C       | 301075 | Kamenoo               | B, C     |
| 301038 | Dam                    | B, C       | 301076 | Kaniranga             | B, C     |
| 301039 | Darmali                | B, C       | 301077 | Kasalath              | B, C     |
| 301040 | Dee Geo Woo Gen        | B, C       | 301079 | Keriting Tingii       | B, C     |
| 301041 | Dhala Shaitta          | B, C       | 301080 | Khao Gaew             | B, C     |
| 301042 | Dom Sufid              | B, C       | 301081 | NSF-TV 89             | B, C     |
| 301043 | Dourado Agulha         | B, C       | 301083 | Kibi                  | B, C     |
| 301045 | DV85                   | B, C       | 301084 | Kinastano             | B, C     |
| 301046 | DZ78                   | B, C       | 301085 | Kitrana 508           | B, C     |

| GSOR   | Name              | Datasets | GSOR   | Name                | Datasets |
|--------|-------------------|----------|--------|---------------------|----------|
| 301086 | Koshihikari       | B, C     | 301132 | Seratoes Hari       | B, C     |
| 301088 | KU115             | B, C     | 301133 | Shai-Kuh            | B, C     |
| 301091 | LAC 23            | B, C     | 301134 | Shinriki            | B, C     |
| 301092 | Lacrosse          | B, C     | 301135 | Shoemed             | B, C     |
| 301093 | Lemont            | B, C     | 301136 | Short Grain         | B, C     |
| 301095 | Luk Takhar        | B, C     | 301137 | Shuang-Chiang       | B, C     |
| 301097 | Mehr              | B, C     | 301138 | Sinampaga Selection | B, C     |
| 301098 | Ming Hui          | B, C     | 301139 | Sintane Diofor      | B, C     |
| 301099 | NSF-TV 107        | B, C     | 301140 | Sinaguing           | B, C     |
| 301100 | Moroberekan       | B, C     | 301141 | Sultani             | B, C     |
| 301101 | MTU9              | B, C     | 301142 | Suweon              | B, C     |
| 301102 | Mudgo             | B, C     | 301143 | T 1                 | B, C     |
| 301104 | N12               | B, C     | 301144 | T26                 | B, C     |
| 301105 | Norin 20          | B, C     | 301145 | Ta Hung Ku          | B, C     |
| 301106 | Nova              | B, C     | 301146 | Ta Mao Tsao         | B, C     |
| 301107 | NPE 835           | B, C     | 301147 | Taichung Native 1   | B, C     |
| 301108 | NSF-TV 116        | B, C     | 301148 | Tainan Iku 487      | B, C     |
| 301109 | O-Luen-Cheung     | B, C     | 301149 | Taipei 309          | B, C     |
| 301110 | Oro               | B, C     | 301150 | Tam Cau 9A          | B, C     |
| 301111 | Oryzica Llanos 5  | B, C     | 301151 | NSF-TV 160          | B, C     |
| 301112 | OS6               | B, C     | 301152 | TeQing              | B, C     |
| 301113 | Ostiglia          | B, C     | 301153 | TKM6                | B, C     |
| 301114 | Padi Kasalle      | B, C     | 301154 | Taducan             | B, C     |
| 301115 | Pagaiyahan        | B, C     | 301155 | Tondok              | B, C     |
| 301390 | Pankhari 203      | B, C     | 301156 | Trembese            | B, C     |
| 301116 | Pao-Tou-Hung      | B, C     | 301157 | Tsipala 421         | B, C     |
| 301117 | Pappaku           | B, C     | 301158 | B6616A4-22-Bk-5-4   | B, C     |
| 301119 | Pato De Gallinazo | B, C     | 301159 | Vary Vato 462       | B, C     |
| 301120 | Peh-Kuh           | B, C     | 301160 | WC 6                | B, C     |
| 301121 | Peh-Kuh-Tsao-Tu   | B, C     | 301161 | Wells               | B, C     |
| 301122 | Phudugey          | B, C     | 301162 | ZHE 733             | B, C     |
| 301123 | Rathuwee          | B, C     | 301163 | Zhenshan 2          | B, C     |
| 301124 | Rikuto Kemochi    | B, C     | 301165 | Azucena             | B, C     |
| 301125 | Romeo             | B, C     | 301167 | 583                 | B, C     |
| 301126 | RT 1031-69        | B, C     | 301168 | Feb.68              | B, C     |
| 301128 | RTS14             | B, C     | 301169 | ARC 6578            | B, C     |
| 301129 | RTS4              | B, C     | 301170 | Bellardone          | B, C     |
| 301130 | S4542A3-49B-2B12  | B, C     | 301171 | Benllok             | B, C     |
| 301131 | Saturn            | B, C     | 301172 | Bergreis            | B, C     |

| GSOR   | Name                  | Datasets | GSOR   | Name                    | Datasets |
|--------|-----------------------|----------|--------|-------------------------|----------|
| 301173 | Blue Rose Supreme     | B, C     | 301221 | Hunan Early Dwarf No. 3 | B, C     |
| 301174 | Boa Vista             | B, C     | 301222 | Shangyu 394             | B, C     |
| 301175 | Bombon                | B, C     | 301223 | Sung Liao 2             | B, C     |
| 301177 | Bul Zo                | B, C     | 301224 | Aijiaonante             | B, C     |
| 301178 | C57-5043              | B, C     | 301225 | Sze Guen Zim            | B, C     |
| 301179 | Coppocina             | B, C     | 301226 | WC 521                  | B, C     |
| 301180 | Criollo La Fria       | B, C     | 301227 | Estrela                 | B, C     |
| 301181 | Delrex                | B, C     | 301228 | WAB 56-104              | B        |
| 301182 | Dom Zard              | B, C     | 301229 | WAB 502-13-4-1          | B, C     |
| 301183 | Erythroceros Hokkaido | B, C     | 301230 | WAB 501-11-5-1          | B, C     |
| 301185 | HG 24                 | B, C     | 301231 | ECIA76-S89-1            | B, C     |
| 301186 | IRAT 13               | B, C     | 301232 | 27                      | B, C     |
| 301187 | JM70                  | B, C     | 301233 | Tropical Rice           | B, C     |
| 301189 | Leah                  | B, C     | 301234 | Arabi                   | B, C     |
| 301191 | P 737                 | B, C     | 301235 | Sab Ini                 | B, C     |
| 301192 | Pate Blanc Mn 1       | B, C     | 301237 | Desvauxii               | B, C     |
| 301193 | Pratao                | B, C     | 301238 | Caucasica               | B, C     |
| 301194 | Radin Ebos 33         | B, C     | 301239 | Pirinae 69              | B, C     |
| 301196 | Rinaldo Bersani       | B, C     | 301240 | Bulgare                 | B, C     |
| 301197 | Rojofotsy 738         | B, C     | 301241 | H256-76-1-1-1           | B, C     |
| 301198 | Sigadis               | B, C     | 301242 | Djimoron                | B, C     |
| 301199 | SLO 17                | B, C     | 301244 | Hon Chim                | B, C     |
| 301200 | Tchibanga             | B, C     | 301245 | Pai Hok Glutinous       | B, C     |
| 301201 | Thavalu               | B        | 301246 | Romanica                | B, C     |
| 301202 | Tokyo Shino Mochi     | B, C     | 301247 | Agusita                 | B, C     |
| 301204 | WC 3397               | B, C     | 301248 | Tia Bura                | B, C     |
| 301205 | WC 4419               | B, C     | 301249 | Sadri Tor Misri         | B, C     |
| 301206 | WC 4443               | B, C     | 301250 | NSF-TV 260              | B, C     |
| 301207 | Yabani Montakhab 7    | B, C     | 301252 | Halwa Gose Red          | B, C     |
| 301208 | YRL-1                 | B, C     | 301253 | Maratelli               | B, C     |
| 301209 | PI 298967-1           | B, C     | 301254 | Baldo                   | B, C     |
| 301210 | Nucleoryza            | B, C     | 301255 | Vialone                 | B, C     |
| 301211 | Azerbaidjanica        | B, C     | 301256 | Hiderisirazu            | B, C     |
| 301212 | Sadri Belyi           | B, C     | 301257 | Hatsunishiki            | B, C     |
| 301213 | Paraiba Chines Nova   | B, C     | 301258 | Vavilovi                | B, C     |
| 301215 | Karabaschak           | B, C     | 301259 | Sundensis               | B, C     |
| 301216 | Biser 1               | B, C     | 301260 | Osogovka                | B, C     |
| 301218 | Riz Local             | B, C     | 301261 | M. Blatec               | B, C     |
| 301219 | CA 902/B/2/1          | B, C     | 301262 | 923                     | B, C     |

| GSOR   | Name                    | Datasets | GSOR   | Name                  | Datasets |
|--------|-------------------------|----------|--------|-----------------------|----------|
| 301263 | Varyla                  | B, C     | 301305 | Dawebyan              | B, C     |
| 301264 | Padi Pagalong           | B, C     | 301306 | DD 62                 | B, C     |
| 301265 | Sri Malaysia Dua        | B, C     | 301307 | DJ 123                | B, C     |
| 301266 | Kaukau                  | B, C     | 301308 | DJ 24                 | B, C     |
| 301267 | Gambiaka Sebela         | B, C     | 301310 | DM 43                 | B, C     |
| 301268 | C1-6-5-3                | B, C     | 301311 | DM 56                 | B, C     |
| 301269 | Kon Suito               | B, C     | 301312 | DM 59                 | B, C     |
| 301270 | Saku                    | B, C     | 301313 | DNJ 140               | B, C     |
| 301271 | Patna                   | B, C     | 301314 | DV 123                | B, C     |
| 301272 | Triomphe Du Maroc       | B, C     | 301315 | EMATA A 16-34         | B, C     |
| 301273 | Chibica                 | B, C     | 301316 | Ghorbhai              | B, C     |
| 301274 | IR-44595                | B, C     | 301317 | Goria                 | B, C     |
| 301275 | Tox 782-20-1            | B, C     | 301318 | Jamir                 | B, C     |
| 301276 | IITA 135                | B, C     | 301319 | Kachilon              | B, C     |
| 301277 | Zerawchanica Karatalski | B, C     | 301320 | Khao Pakh Maw         | B, C     |
| 301279 | Lusitano                | B, C     | 301321 | Khao Tot Long 227     | B, C     |
| 301280 | Amposta                 | B, C     | 301322 | KPF-16                | B, C     |
| 301281 | Toploea 70/76           | B, C     | 301323 | Leuang Hawn           | B, C     |
| 301282 | Stegaru 65              | B, C     | 301324 | Lomello               | B, C     |
| 301283 | TOg 7178                | B, C     | 301325 | Okshitmayin           | B, C     |
| 301284 | SL 22-613               | B, C     | 301326 | Paung Malaung         | B, C     |
| 301286 | Dosel                   | B, C     | 301327 | Sabharaj              | B, C     |
| 301287 | Bahia                   | B, C     | 301328 | Sitpwa                | B, C     |
| 301288 | LD 24                   | B, C     | 301329 | Yodanya               | B, C     |
| 301289 | SML 242                 | B, C     | 301330 | Berenj                | B, C     |
| 301290 | Sml Kapuri              | B, C     | 301331 | Shirkati              | B, C     |
| 301291 | Melanotrix              | B, C     | 301332 | Cenit                 | B, C     |
| 301292 | WIR 3039                | B, C     | 301333 | Victoria F.A.         | B, C     |
| 301293 | Kihogo                  | B, C     | 301334 | Habiganj Boro 6       | B, C     |
| 301294 | 519                     | B, C     | 301335 | DZ 193                | B, C     |
| 301296 | WIR 3764                | B, C     | 301336 | Karkati 87            | B, C     |
| 301297 | Uzbekskij 2             | B, C     | 301337 | Creole                | B, C     |
| 301298 | Llanero 501             | B, C     | 301338 | China 1039            | B, C     |
| 301299 | Manzano                 | B, C     | 301339 | Chang Ch'Sang Hsu Tao | B, C     |
| 301300 | R 101                   | B, C     | 301340 | Ligerito              | B, C     |
| 301301 | 56-122-23               | B, C     | 301393 | Guatemala 1021        | B, C     |
| 301302 | Aswina 330              | B, C     | 301341 | ARC 10376             | B, C     |
| 301303 | BR24                    | B, C     | 301342 | BALA                  | B        |
| 301304 | CTG 1516                | B, C     | 301343 | ASD 1                 | B, C     |

| GSOR   | Name               | Datasets | GSOR   | Name                     | Datasets |
|--------|--------------------|----------|--------|--------------------------|----------|
| 301344 | JC 117             | B, C     | 301404 | Pecos                    | B, C     |
| 301345 | 9524               | B, C     | 301405 | Rosemont                 | B, C     |
| 301347 | Surjamkuhi         | B, C     | 301406 | Jasmine85                | B, C     |
| 301348 | PTB 30             | B, C     | 301402 | LaGrue                   | B, C     |
| 301350 | Edomen Scented     | B, C     | 301418 | Bengal                   | B, C     |
| 301351 | Rikuto Norin 21    | B, C     | 301407 | Shufeng 121-1655         | B, C     |
| 301352 | Shirogane          | B, C     | 301408 | Kaybonnet                | B, C     |
| 301353 | Kiuki No. 46       | B, C     | 301419 | Katy                     | B, C     |
| 301354 | Sanbyang-Daeme     | B, C     | 301420 | C101A51                  | B, C     |
| 301355 | Deokjeokjodo       | B, C     | 301421 | Early                    | B, C     |
| 301356 | Sathi              | B, C     | 301409 | Jefferson                | B, C     |
| 301358 | Santhi Sufaid      | B, C     | 301410 | Panda                    | B, C     |
| 301359 | Sufaid             | B, C     | 301411 | Saber                    | B, C     |
| 301360 | Lambayeque 1       | B, C     | 301412 | Dragon Eyeball 100       | B        |
| 301396 | WC 2810            | B, C     | 301413 | Francis                  | B, C     |
| 301361 | Breviaristata      | B, C     | 301414 | Jing 185-7               | B, C     |
| 301362 | PR 304             | B, C     | 301415 | Rondo (4484-1693)        | B, C     |
| 301363 | Kalubala Vee       | B, C     | 312001 | Azucena                  | B, C     |
| 301364 | Wanica             | B, C     | 312002 | Sadu Cho                 | B, C     |
| 301365 | Tainan-Iku No. 512 | B, C     | 312003 | N 22                     | B, C     |
| 301366 | 325                | B, C     | 312004 | Moroberekan              | B, C     |
| 301367 | 318                | B, C     | 312005 | Nipponbare               | B, C     |
| 301368 | Nira               | B, C     | 312006 | Dom Sufid                | B, C     |
| 301369 | Palmyra            | B, C     | 312007 | Tainung 67               | B, C     |
| 301370 | M-202              | B, C     | 312008 | Zhenshan 97B             | B, C     |
| 301371 | Nortai             | B, C     | 312009 | Minghui 63               | B, C     |
| 301373 | CI 11026           | B, C     | 312010 | IR64                     | B, C     |
| 301374 | Della              | B, C     | 312011 | M-202                    | B, C     |
| 301375 | Edith              | B, C     | 312012 | Swarna                   | B        |
| 301376 | La 110             | B        | 312013 | Cypress                  | B, C     |
| 301377 | Lady Wright Seln   | B, C     | 312015 | FR13A                    | B        |
| 301378 | OS 6 (WC 10296)    | B, C     | 312016 | Aswina                   | B        |
| 301379 | Cocodrie           | B, C     | 312017 | Dular                    | B, C     |
| 301380 | Cybonnet           | B, C     | 312018 | Li-Jiang-Xin-Tuan-Hei-Gu | B, C     |
| 301399 | Nov.93             | B, C     | 312020 | Pokkali                  | B        |
| 301381 | Spring             | B, C     |        |                          |          |
| 301400 | Yang Dao 6         | B, C     |        |                          |          |
| 301416 | RT0034             | B, C     |        |                          |          |
| 301417 | MCR010277          | B        |        |                          |          |

\*Identification number of the GSOR

\*\*Datasets in which each accession was involved
